1 ***Phylo-Node: a molecular phylogenetic toolkit using Node.js***

2

3

4 Damien M. O'Halloran<sup>1,2\*</sup>

5

6 1. Department of Biological Sciences, The George Washington University, Science  
7 and Engineering Hall, Rm 6000, 800 22nd Street N.W., Washington DC 20052, USA.

8 2. Institute for Neuroscience, The George Washington University, 636 Ross Hall,  
9 2300 I St. N.W. Washington DC 20052, USA.

10

11

12

13 **\*Corresponding author address:**

14 Damien O'Halloran, The George Washington University, 636 Ross Hall, 2300 I St.  
15 N.W. Washington DC 20052, USA.

16 Tel: 202-994-8955

17 Fax: 202-994-6100

18 EMAIL: [damienoh@gwu.edu](mailto:damienoh@gwu.edu)

19

20

21

22

23

24

25

## 26 **ABSTRACT**

27 **Background:** Node.js is an open-source and cross-platform environment that  
 28 provides a JavaScript codebase for back-end server-side applications. JavaScript  
 29 has been used to develop very fast, and user-friendly front-end tools for bioinformatic  
 30 and phylogenetic analyses. However, no such toolkits are available using Node.js to  
 31 conduct comprehensive molecular phylogenetic analysis.

32 **Results:** To address this problem, I have developed, *Phylo-Node*, which was  
 33 developed using Node.js and provides a stable and scalable toolkit that allows the  
 34 user to go from sequence retrieval to phylogeny reconstruction. Phylo-Node can  
 35 execute the analysis and process the resulting outputs from a suite of software  
 36 options that provides tools for sequence retrieval, alignment, primer design,  
 37 evolutionary modeling, and phylogeny reconstruction. Furthermore, Phylo-Node  
 38 provides simple integration and interoperation with other Node modules to develop  
 39 workflows across multiple components and languages using Node inheritance  
 40 patterns and a customized piping module to support the production of diverse  
 41 pipelines.

42 **Conclusions:** Phylo-Node is open-source and freely available to all users without  
 43 sign-up or login requirements. All source code and user guidelines are openly  
 44 available at the GitHub repository: <https://github.com/dohalloran/Phylo-Node>

45

46 **Keywords:** Node.js, JavaScript, phylogenetics

47

48

49

50

## 51     **BACKGROUND**

52     The cost of whole genome sequencing has plummeted over the last decade and as  
 53     a consequence, the demand for genome sequencing technology has risen  
 54     significantly [1]. This demand has meant that producing large complex datasets of  
 55     DNA and RNA sequence information is common in small research labs, and in terms  
 56     of human health this boom in sequence information and precipitous drop in  
 57     sequencing costs has had a direct impact in the area of personalized medicine [2-5].  
 58     However, once the sequence information becomes available, perhaps the greater  
 59     challenge is then processing, analyzing, and interpreting the data. To keep pace with  
 60     this challenge, the development of new, fast, and scalable software solutions is  
 61     required to visualize and interpret this information.

62         JavaScript is a lightweight programming language that uses a web browser as  
 63     its host environment. JavaScript is cross-platform and supported by all modern  
 64     browsers. Because JavaScript is client-side, it is very fast, as it doesn't have to  
 65     communicate with a server and wait for a response in order to run some code. Web  
 66     browsers are ubiquitous and require no dependencies to deploy and operate, and so  
 67     JavaScript represents an obvious solution for visualizing sequence information.  
 68     Front-end developments using JavaScript have proven to be extremely efficient in  
 69     providing fast, easy-to-use, and embeddable solutions for data analysis [6-14]. A  
 70     very active community of developers at BioJS (<http://www.biojs.io/>) provide diverse  
 71     components for parsing sequence data types, data visualization, and bioinformatics  
 72     analysis in JavaScript [6, 7, 15-19].

73         Node.js provides server-side back-end JavaScript. Node.js is written in C,  
 74     C++, and JavaScript and uses the Google Chrome V8 engine to offer a very fast  
 75     cross-platform environment for developing server side Web applications. Node is a

76 single-threaded environment, which means that only one line of code will be  
 77 executed at any given time; however, Node employs non-blocking techniques for I/O  
 78 tasks to provide an asynchronous ability, by using *callback* functions to permit the  
 79 parallel running of code. Node holds much potential for the bioinformatic analysis of  
 80 molecular data. A community of Node developers provides modules for bioinformatic  
 81 sequence workflows (<http://www.bionode.io/>) which in time will likely parallel the  
 82 BioJS community for the number of modules versus components. However, as of  
 83 now there are no robust tools for phylogenetic analysis pipelines currently available  
 84 using the Node.js codebase. To fill this void I have developed, *Phylo-Node*, which  
 85 provides a Node.js toolkit that goes from sequence retrieval, to primer design, to  
 86 alignment, to phylogeny reconstruction, all from a single toolkit. MolPhylo is fast,  
 87 easy to use, and offers simple customization and portability options through various  
 88 inheritance patterns. The Node package manager, *npm* (<https://www.npmjs.com/>),  
 89 provides a very easy and efficient way to manage dependencies for any Node  
 90 application. Phylo-Node is available at GitHub ([https://github.com/dohalloran/Phylo-](https://github.com/dohalloran/Phylo-Node)  
 91 [Node](https://github.com/dohalloran/Phylo-Node)), *npm* (<https://www.npmjs.com/package/phylo-node>), and also BioJS  
 92 (<http://www.biojs.io/d/phylo-node>).

93

## 94 **IMPLEMENTATION**

95 Phylo-Node was developed using the Node.js codebase. The Phylo-Node core  
 96 contains methods for remote sequence retrieval, and phylogenetic analysis using a  
 97 suite of popular software tools. A base wrapper object is used to prepare the  
 98 arguments and directory prior to program execution. The base wrapper module is  
 99 contained within the 'Wrapper\_core' directory. An individual software tool can be  
 100 easily accessed and executed by importing the module for that tool so as to get

access to the method properties on that object (Figure 1). These method properties are available to the user by using the 'module.exports' reference object. Inside a driver script file, the user can import the main module object properties and variables by using the 'require' keyword which is used to import a module in Node.js. The 'require' keyword is actually a global variable, and a script has access to its context because it is wrapped prior to execution inside the 'runInThisContext' function (for more details, refer to the Node.js source code: <https://github.com/nodejs>). Once imported, the return value is assigned to a variable which is used to access the various method properties on that object. For example: a method property on the 'phym1' object is 'phym1.getphym1()', which invokes the 'getphym1' method on the 'phym1' object to download and decompress the PhyML executable. For a complete list of all methods, refer to the 'README' file at the GitHub repository (<https://github.com/dohalloran/Phylo-Node/blob/master/README.md>). In order to correctly wrap and run each executable, new shells must be spawned so as to execute specific command formats for each executable. This was achieved by using 'child.process.exec', which will launch an external shell and execute the command inside that shell while buffering any output by the process. Binary files and executables were downloaded and executed in this manner and the appropriate file and syntax selected by determining the user's operating system. Phylo-Node was validated on Microsoft Windows 7 Enterprise ver.6.1, MacOSX El Capitan ver.10.11.5, and Linux Ubuntu 64-bit ver.14.04 LTS.

## RESULTS AND DISCUSSION

Phylo-Node is a toolkit to interface with key applications necessary in building a phylogenetic pipeline (Figure 2). Firstly, Phylo-Node allows the user to remotely

download sequences by building a unique URL and passing this string to the NCBI e-utilities API (<http://www.ncbi.nlm.nih.gov/books/NBK25501/>). Any number of genes can be supplied as command-line arguments to Phylo-Node by accessing the *fetch\_seqs.fasta* method on the *fetch\_seqs* object in order to retrieve sequence information in FASTA format. The module for remote sequence retrieval is contained within the 'Sequence' directory. Phylo-Node also provides methods on specific objects to download various executable files using the 'download' module. Any binary can be downloaded using the base module 'get\_executable' contained within the 'Download' directory, however objects pertaining to specific tools such as PhyML also contain methods for downloading and unpacking binaries (see README.md file for details). Phylo-Node then provides modules to execute the following programs from within the './Tool/Run' directory: Primer3 [20-22] to facilitate primer design; Clustal Omega [23], K-align [24], and MUSCLE [25, 26] for multiple sequence alignments; jModelTest2 [27] and ProtTest3 [28] to determine the best-fit model of evolution, and PhyML [29, 30] for phylogeny reconstruction. The PhyML executable is also employed by jModelTest2 and ProtTest3. Primer3 is the most popular software for primer design, and takes a very lengthy list of input variables to optimize primer selection. Clustal Omega, K-align, and MUSCLE are very fast and accurate multiple sequence alignment tools that are commonly used to build robust DNA, RNA, or protein alignments. PhyML is a popular program for building phylogenies using maximum likelihood, and ProtTest3 determines the best-fit model of evolution for protein sequences across 120 different potential models, while jModelTest2 determines best-fit models of nucleotide substitution from DNA sequence alignments. Together, Phylo-Node provides a novel toolkit that allows the user to go from raw sequence to phylogeny using Node.

Phylo-Node is highly scalable and customizable, and was inspired by projects such as BioPerl [31] which provides very diverse tools that include Perl modules for many bioinformatic tasks and also parsers and wrappers for diverse sequence formats and applications. BioPerl's open source structure and architecture allows users to plug new modules into BioPerl pipelines to design new applications. Node.js implements prototypal inheritance as per JavaScript but also provides access to the 'module.exports' object which permits easy portability between the Phylo-Node toolkit and any other modules, and also interoperation between different languages by using the 'child.process.exec' process. Therefore, Phylo-Node can be integrated with existing Node.js bioinformatics tools [32, 33] or software written in other languages. For example, both jModelTest2 and ProtTest3 require a Java runtime environment (<http://www.oracle.com/technetwork/java/javase/downloads/jre8-downloads-2133155.html>), and by using 'require' to import each module, the user can execute the analysis of jModelTest2 and ProtTest3. The 'protest' and 'jmodeltest2' modules and driver scripts (index.js) are contained within the respective 'Protest3' and 'jModelTest2' directories and sample input is provided in the 'COX2\_PF0016' sub-directory of the 'Input\_examples' folder for ProtTest3 and the sample FASTA file aP6.fas (also contained within the 'Input\_examples' folder) can be used for testing jModelTest2.

To further facilitate the ease of interoperation between various applications and components, the Phylo-Node package also contains a module called 'phylo-node\_pipes' inside the 'Pipes' directory. The 'phylo-node\_pipes' module allows the user to easily pipe data between different applications by requiring the 'child\_process' module which provides the ability to spawn child processes. Through 'phylo-node\_pipes', the user can chain commands together that will be executed in

sequence to build consistent, and extensive pipelines. The 'Pipes' directory contains sample driver scripts for using the 'phylo-node\_pipes' module.

## CONCLUSIONS

In conclusion, Phylo-Node is a novel package that leverages the speed of Node.js to provide a robust and efficient toolkit for researchers conducting molecular phylogenetics. Phylo-Node can be easily employed to develop complex but consistent workflows, and integrated with existing bioinformatics tools using the Node.js codebase.



201

## 202 **AVAILABILITY AND REQUIREMENTS**

- 203 • Project name: Phylo-Node
- 204 • Project home page: <https://github.com/dohalloran/phylo-node>
- 205 • Operating system(s): Platform independent
- 206 • Programming language: Node.js
- 207 • Other requirements: none
- 208 • License: MIT
- 209 • Any restrictions to use by non-academics: no restrictions or login requirements

210

## 211 **ACKNOWLEDGMENTS**

212 I thank members of the O'Halloran lab for critical reading of the manuscript, and  
 213 would like to thank The George Washington University (GWU) Columbian College of  
 214 Arts and Sciences, GWU Office of the Vice-President for Research, and the GWU  
 215 Department of Biological Sciences for Funding.

216

## 217 **AUTHOR CONTRIBUTIONS**

218 D.O'H. conceived the idea for *Phylo-Node*, wrote and tested the code, and wrote the  
 219 manuscript.

220

## 221 **COMPETING INTERESTS**

222 The author declares no competing interests.

223

224

225

226

## References

- 227 1. Shaffer C: **Next-generation sequencing outpaces expectations.** Nat Biotechnol  
228 2007, **25**(2):149.
- 229 2. Wade N: **The quest for the \$1,000 human genome: DNA sequencing in the**  
230 **doctor's office? At birth? It may be coming closer.** N Y Times Web 2006, :F1,  
231 F3.
- 232 3. Mardis ER: **Anticipating the 1,000 dollar genome.** Genome Biol 2006, **7**(7):112.
- 233 4. Service RF: **Gene sequencing. The race for the \$1000 genome.** Science 2006,  
234 **311**(5767):1544-1546.
- 235 5. Hayden EC: **The \$1,000 genome.** Nature 2014, **507**(7492):294-295.
- 236 6. Yachdav G, Goldberg T, Wilzbach S, Dao D, Shih I, Choudhary S, Crouch S,  
237 Franz M, Garcia A, Garcia LJ, Gruning BA, Inupakutika D, Sillitoe I, Thanki AS,  
238 Vieira B, Villaveces JM, Schneider MV, Lewis S, Pettifer S, Rost B, Corpas M:  
239 **Anatomy of BioJS, an open source community for the life sciences.** Elife 2015,  
240 **4**:10.7554/eLife.07009.
- 241 7. Gomez J, Garcia LJ, Salazar GA, Villaveces J, Gore S, Garcia A, Martin MJ,  
242 Launay G, Alcantara R, Del-Toro N, Dumousseau M, Orchard S, Velankar S,  
243 Hermjakob H, Zong C, Ping P, Corpas M, Jimenez RC: **BioJS: an open source**  
244 **JavaScript framework for biological data visualization.** Bioinformatics 2013,  
245 **29**(8):1103-1104.
- 246 8. Salazar GA, Meintjes A, Mulder N: **PPI layouts: BioJS components for the**  
247 **display of Protein-Protein Interactions.** F1000Res 2014, **3**:50-50.v1. eCollection  
248 2014.
- 249 9. Gomez J, Jimenez R: **Sequence, a BioJS component for visualising**  
250 **sequences.** F1000Res 2014, **3**:52-52.v1. eCollection 2014.
- 251 10. Cui Y, Chen X, Luo H, Fan Z, Luo J, He S, Yue H, Zhang P, Chen R:  
252 **BioCircos.js: an interactive Circos JavaScript library for biological data**  
253 **visualization on web applications.** Bioinformatics 2016, **32**(11):1740-1742.
- 254 11. Buels R, Yao E, Diesh CM, Hayes RD, Munoz-Torres M, Helt G, Goodstein DM,  
255 Elsik CG, Lewis SE, Stein L, Holmes IH: **JBrowse: a dynamic web platform for**  
256 **genome visualization and analysis.** Genome Biol 2016, **17**(1):66-016-0924-1.
- 257 12. Salavert F, Garcia-Alonso L, Sanchez R, Alonso R, Bleda M, Medina I, Dopazo  
258 J: **Web-based network analysis and visualization using CellMaps.** Bioinformatics  
259 2016, .

- 260 13. Franz M, Lopes CT, Huck G, Dong Y, Sumer O, Bader GD: **Cytoscape.js: a**  
261 **graph theory library for visualisation and analysis**. Bioinformatics 2016,  
262 **32(2):309-311**.
- 263 14. Vanderkam D, Aksoy BA, Hodes I, Perrone J, Hammerbacher J: **pileup.js: a**  
264 **JavaScript library for interactive and in-browser visualization of genomic data**.  
265 Bioinformatics 2016, .
- 266 15. Garcia L, Yachdav G, Martin MJ: **FeatureViewer, a BioJS component for**  
267 **visualization of position-based annotations in protein sequences**. F1000Res  
268 2014, **3:47-47.v2**. eCollection 2014.
- 269 16. Kalderimis A, Stepan R, Sullivan J, Lyne R, Lyne M, Micklem G: **BioJS**  
270 **DAGViewer: A reusable JavaScript component for displaying directed graphs**.  
271 F1000Res 2014, **3:51-51.v1**. eCollection 2014.
- 272 17. Villaveces JM, Jimenez RC, Habermann BH: **KEGGViewer, a BioJS**  
273 **component to visualize KEGG Pathways**. F1000Res 2014, **3:43-43.v1**.  
274 eCollection 2014.
- 275 18. Villaveces JM, Jimenez RC, Habermann BH: **PsicquicGraph, a BioJS**  
276 **component to visualize molecular interactions from PSICQUIC servers**.  
277 F1000Res 2014, **3:44-44.v1**. eCollection 2014.
- 278 19. Yachdav G, Hecht M, Pasmanik-Chor M, Yeheskel A, Rost B: **HeatMapView:**  
279 **interactive display of 2D data in biology**. F1000Res 2014, **3:48-48.v1**. eCollection  
280 2014.
- 281 20. You FM, Huo N, Gu YQ, Luo MC, Ma Y, Hane D, Lazo GR, Dvorak J, Anderson  
282 OD: **BatchPrimer3: a high throughput web application for PCR and sequencing**  
283 **primer design**. BMC Bioinformatics 2008, **9:253-2105-9-253**.
- 284 21. Untergasser A, Cutcutache I, Koressaar T, Ye J, Faircloth BC, Remm M, Rozen  
285 SG: **Primer3--new capabilities and interfaces**. Nucleic Acids Res 2012,  
286 **40(15):e115**.
- 287 22. Untergasser A, Nijveen H, Rao X, Bisseling T, Geurts R, Leunissen JA:  
288 **Primer3Plus, an enhanced web interface to Primer3**. Nucleic Acids Res 2007,  
289 **35(Web Server issue):W71-4**.
- 290 23. Sievers F, Wilm A, Dineen D, Gibson TJ, Karplus K, Li W, Lopez R, McWilliam H,  
291 Remmert M, Soding J, Thompson JD, Higgins DG: **Fast, scalable generation of**  
292 **high-quality protein multiple sequence alignments using Clustal Omega**. Mol  
293 Syst Biol 2011, **7:539**.
- 294 24. Lassmann T, Sonnhammer EL: **Kalign--an accurate and fast multiple**  
295 **sequence alignment algorithm**. BMC Bioinformatics 2005, **6:298**.

25. Edgar RC: **MUSCLE: multiple sequence alignment with high accuracy and high throughput.** Nucleic Acids Res 2004, **32**(5):1792-1797.
26. Edgar RC: **MUSCLE: a multiple sequence alignment method with reduced time and space complexity.** BMC Bioinformatics 2004, **5**:113.
27. Darriba D, Taboada GL, Doallo R, Posada D: **jModelTest 2: more models, new heuristics and parallel computing.** Nat Methods 2012, **9**(8):772.
28. Darriba D, Taboada GL, Doallo R, Posada D: **ProtTest 3: fast selection of best-fit models of protein evolution.** Bioinformatics 2011, **27**(8):1164-1165.
29. Guindon S, Gascuel O: **A simple, fast, and accurate algorithm to estimate large phylogenies by maximum likelihood.** Syst Biol 2003, **52**(5):696-704.
30. Guindon S, Dufayard JF, Lefort V, Anisimova M, Hordijk W, Gascuel O: **New algorithms and methods to estimate maximum-likelihood phylogenies: assessing the performance of PhyML 3.0.** Syst Biol 2010, **59**(3):307-321.
31. Stajich JE, Block D, Boulez K, Brenner SE, Chervitz SA, Dagdigian C, Fuellen G, Gilbert JG, Korf I, Lapp H, Lehvaslaiho H, Matsalla C, Mungall CJ, Osborne BI, Pocock MR, Schattner P, Senger M, Stein LD, Stupka E, Wilkinson MD, Birney E: **The Bioperl toolkit: Perl modules for the life sciences.** Genome Res 2002, **12**(10):1611-1618.
32. Kim J, Levy E, Ferbrache A, Stepanowsky P, Farcas C, Wang S, Brunner S, Bath T, Wu Y, Ohno-Machado L: **MAGI: a Node.js web service for fast microRNA-Seq analysis in a GPU infrastructure.** Bioinformatics 2014, **30**(19):2826-2827.
33. Page M, MacLean D, Schudoma C: **blastjs: a BLAST+ wrapper for Node.js.** BMC Res Notes 2016, **9**:130-016-1938-1.

## FIGURE LEGENDS

### Figure 1. Workflow for Phylo-Node.

Phylo-Node is organized into a workflow of connected modules and driver scripts. In order to interface with a phylogenetic tool, the base wrapper module is invoked to process command-line requests that are then passed into the software specific module. The input for the specific software can be passed into the base wrapper from: a) sample input directory; b) from a folder specified by the user; or c) by using the sequence retrieval module which is contained within the 'Sequence' directory. The 'Pipes' folder contains a module for easy piping of data between applications in Phylo-Node. Binaries can be downloaded using the 'get\_executable' module from within the 'Download' folder.

### Figure 2. Graphical overview of Phylo-Node applications within the *./Tools/Run* directory.

Phylo-Node provides a toolkit for interacting with various applications including: the sequence alignment software Clustal Omega [23], K-align [24], and MUSCLE [25, 26]; the primer design software, Primer3 [20-22]; software for determining the best-fit models of evolution: jModelTest2 [27] and ProtTest3 [28]; and also the phylogeny reconstruction software, PhyML [29, 30]. Phylo-Node also enables the user to retrieve sequences remotely from the NCBI database using Entrez Programming Utilities. A key feature of Phylo-Node is interoperability between languages and other Node modules, which can be easily leveraged to form stable and scalable pipelines. This concept of interoperation and inheritance is highlighted by the brown cog at the bottom of Figure 2 that represents the potential to integrate any other module(s) [*require('./module');*] with Phylo-Node.

**Figure1**

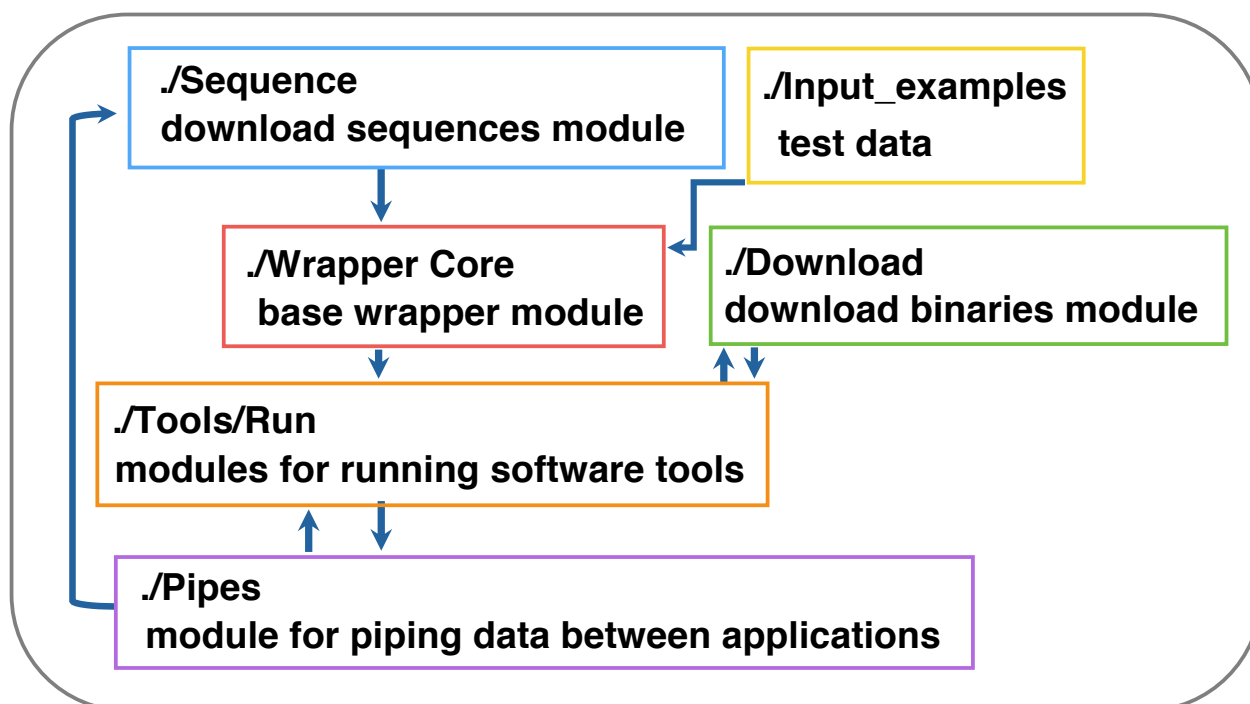

## Figure 2

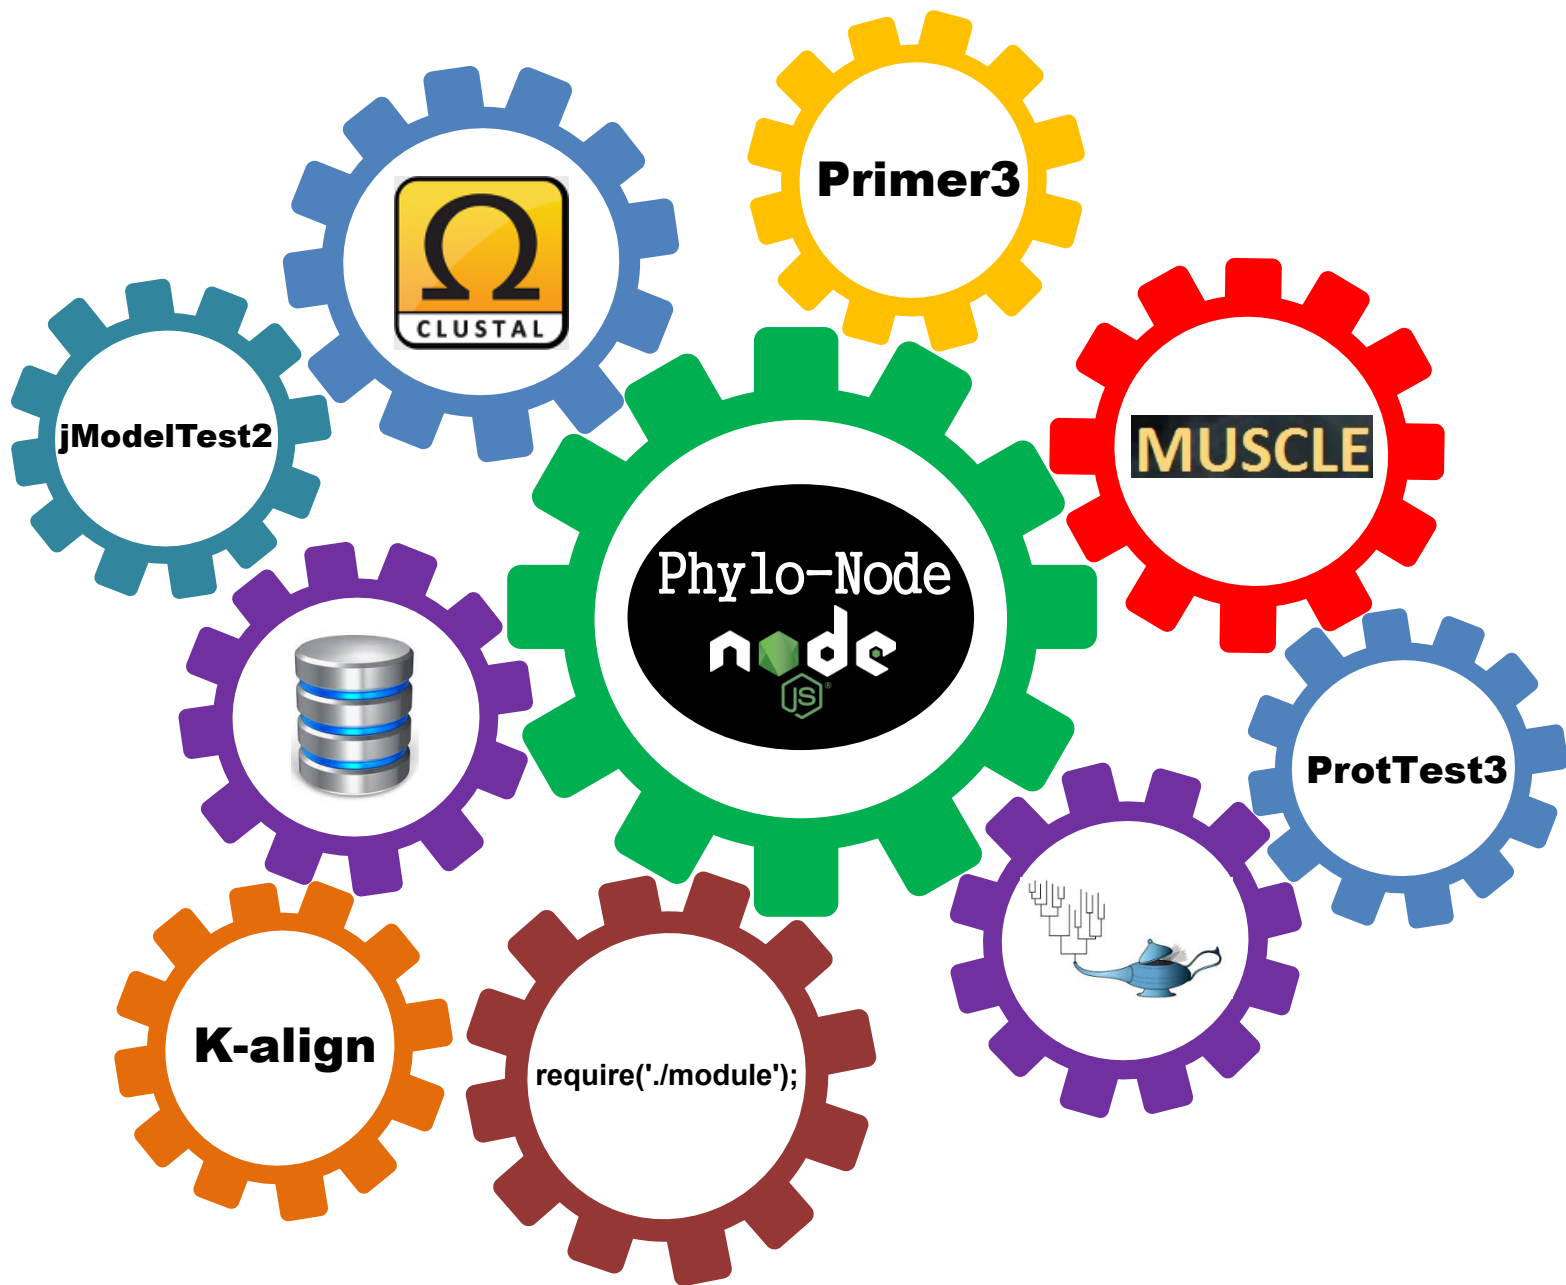

Source: http://biorxiv.org/content/10.1101/075101v3.full.pdf
